# Supplementary material for: A 2-D coordination polymer incorporating cobalt(ii), 2-sulfoterephthalate and the flexible bridging ligand 1,3-di(4-pyridyl)propane
Source: Royal Society of Chemistry journal article supplement (doi:10.1039/c4qi00201f), 2014-12-15
Supplement: c4qi00201f1.pdf [file c4qi00201f1.pdf]

# A 2-D Coordination Polymer Incorporating Cobalt(II), 2-Sulfoterephthalate and the Flexible Bridging Ligand 1,3-di(4-pyridyl)propane: Preparation, Gas Adsorption, and EPR Studies†

Amitabha Datta,<sup>\*a</sup> Kuheli Das,<sup>b</sup> Chiara Massera,<sup>c</sup> Jack K. Clegg,<sup>\*d</sup> Michael C. Pfrunder,<sup>d</sup> Eugenio Garribba,<sup>e</sup> Jui-Hsien Huang,<sup>\*a</sup> Chittaranjan Sinha,<sup>\*b</sup> Tapas Kumar Maji,<sup>f</sup> Takashiro Akitsu<sup>g</sup> and Shingo Orita.<sup>g</sup>

## Supplementary Information

### Additional information on Physical techniques

#### Fluorescence

The fluorescence quantum yield of the complexes was determined using anthracene as a reference with known  $\Phi_R$  of 0.27 in ethanol. The complex and the reference dye were excited at same wavelength, maintaining nearly equal absorbance ( $\sim 0.1$ ), and the emission spectra were recorded. The area of the emission spectrum was integrated using the software available in the instrument and the quantum yield is calculated according to the following equation:

$$\phi_s / \phi_R = \left[ \frac{A_s}{A_R} \right] \times \left[ \frac{(Abs)_R}{(Abs)_s} \right] \times \left[ \frac{\eta_s^2}{\eta_R^2} \right]$$

Here,  $\Phi_S$  and  $\Phi_R$  are the fluorescence quantum yield of the sample and reference, respectively.  $A_S$  and  $A_R$  are the area under the fluorescence spectra of the sample and the reference, respectively,  $(Abs)_S$  and  $(Abs)_R$  are the respective optical densities of the sample and the reference solution at the wavelength of excitation, and  $\eta_S$  and  $\eta_R$  are the values of refractive index for the respective solvent used for the sample and reference.

## *EPR*

EPR spectra were recorded from 0 to 10000 Gauss in the temperature range 77-298 K with an X-band (9.15 GHz) Varian E-9 spectrometer. EPR parameters reported in the text for the solid polycrystalline compound were obtained by simulating the spectra with the computer program Bruker WinEPR SimFonia.<sup>S1</sup> In all the simulations, second-order effects were taken into account and the ratio Lorentzian/Gaussian, affecting the line shape, was set to 1. To increase the signal to noise ratio, in these systems, signal averaging was used. Signal averaging involves repeatedly acquiring the spectrum and adding each spectrum together. Actually, this is not an average in the strict mathematical sense but is the sum of the individual spectra. As a result, the signal increases proportionally to  $N$ , where  $N$  is the number of scans, and the noise to  $\sqrt{N}$ , owing to its random nature; therefore, the resultant enhancement of the signal to noise ratio is proportional to  $\sqrt{N}$ .

## **Additional Figures**

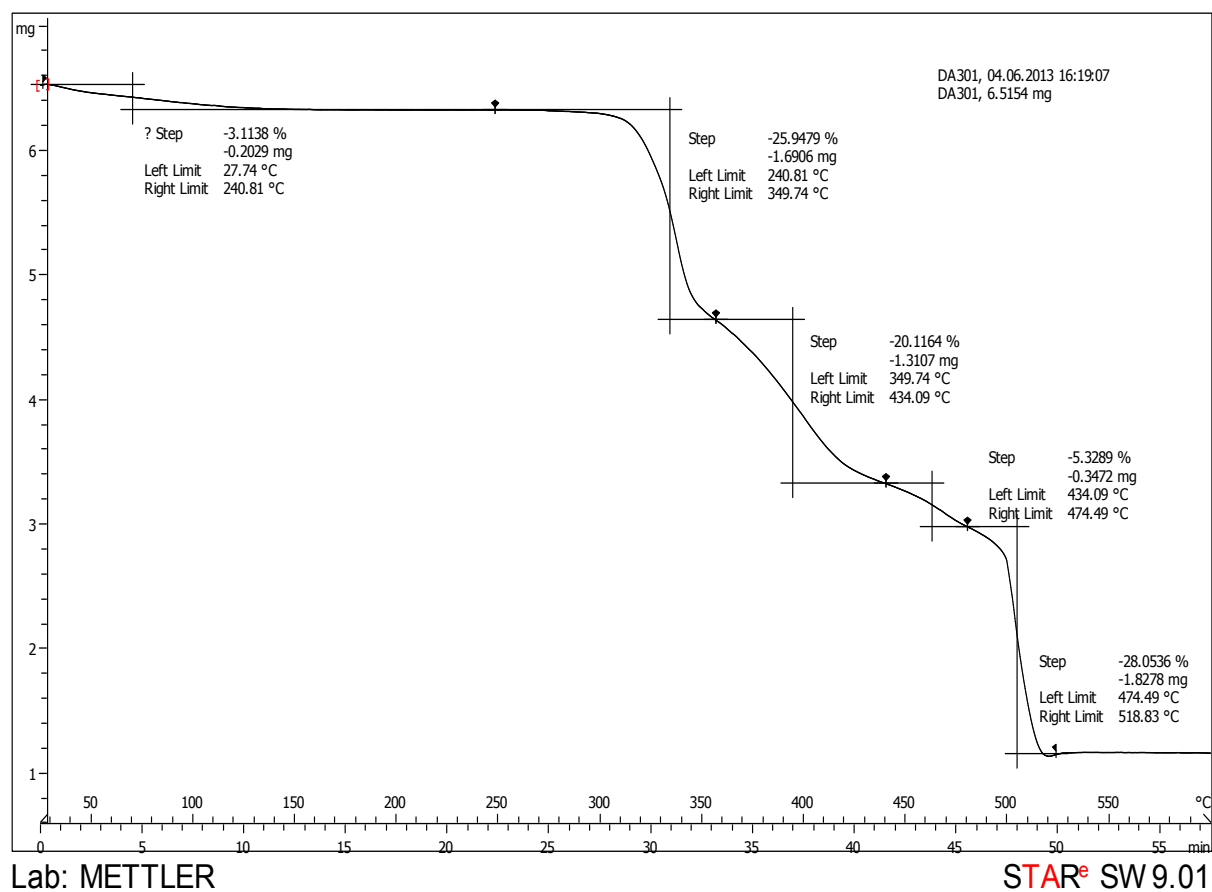

**Fig. S1** Thermogravimetric analysis plot for 1.

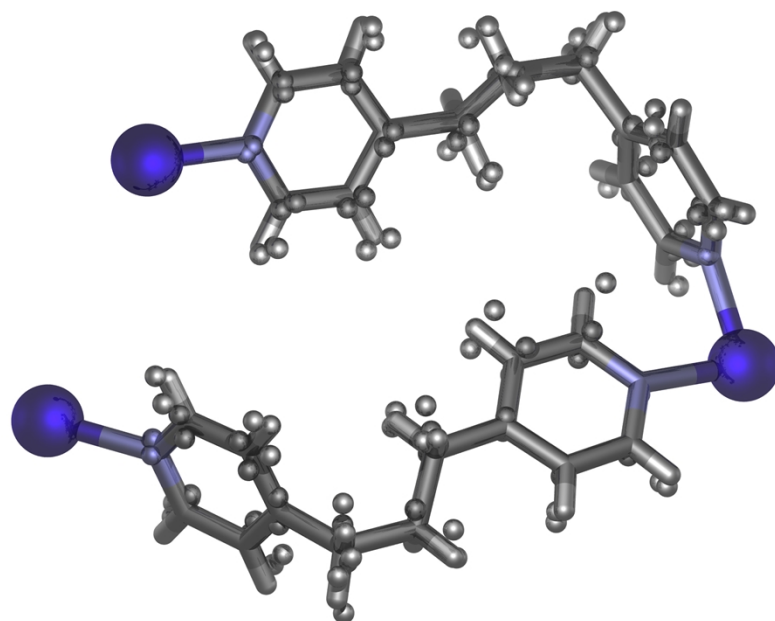

**Fig. S2.** Diagram showing the disorder present in the **dpp** ligands in the desolvated structure  $\{[\text{Co}_3(\mathbf{2}\text{-stp})_2(\mathbf{dpp})_4]\}_n$ .

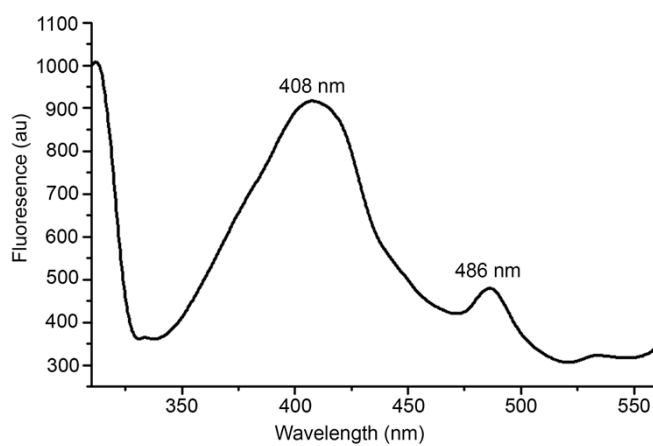

**Fig. S3.** Emission spectrum of complex **1** in the solid state.

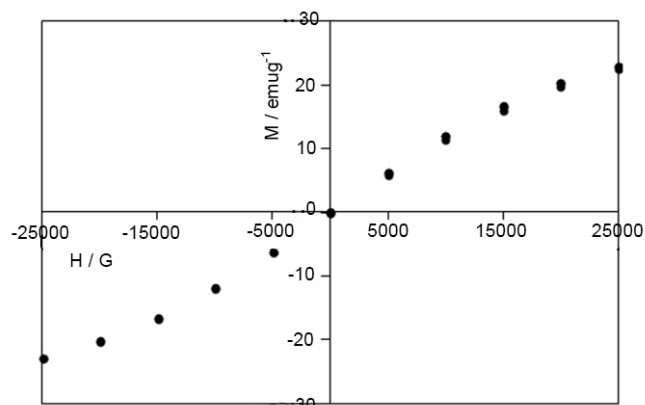

**Fig. S4.** The M vs H plot for the complex at 5 K for **1**.

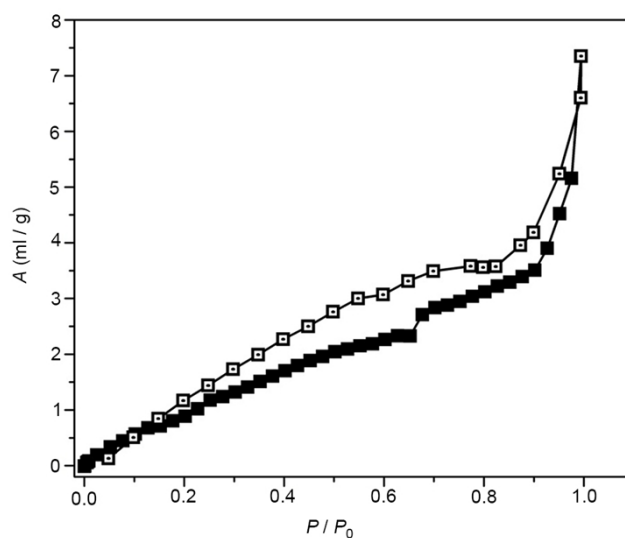

**Fig. S5.** N<sub>2</sub> adsorption isotherm of desolvated **1** measured at 77 K.  $P_0 = 690$  mm of Hg. Closed symbols and open symbols correspond to adsorption and desorption, respectively.

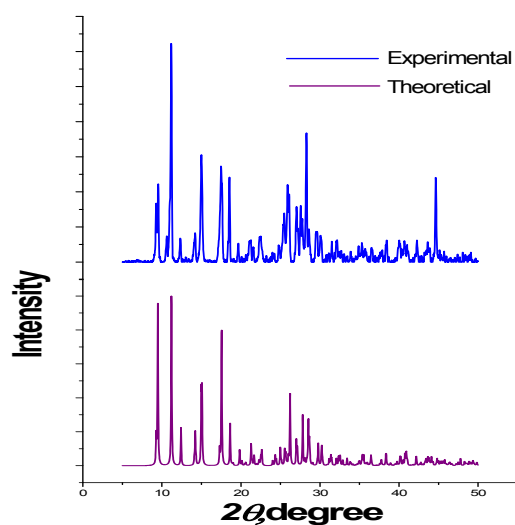

**Fig. S6.** PXRD patterns for {[Co<sub>3</sub>(2-stp)<sub>2</sub>(dpp)<sub>4</sub>]·2H<sub>2</sub>O}<sub>n</sub> as prepared (top) and predicted from the single crystal structure (bottom).

## Additional discussion regarding topology of **1**

While we have chosen to assign the topology of **1** as (3,4,5)-c trinodal net with point symbol  $\{4.6^2\}_2\{4^2.6^3.8\}\{4^2.6^6.8^2\}_2$  by defining Co1 as a 5-connected node, Co2 as a 4-c node, the **2-stp** ligand as 3-c node and the **dpp** ligand as linear connector, it is possible to describe the topology differently using the cluster simplification approach.<sup>S2</sup> For example, if the trimeric unit  $[\text{Co}_3(\mathbf{2-stp})_2]$  is considered as a cluster node and **dpp** as a simple connector, **1** can be described as as a sql/Shubnikov tetragonal plane net  $\{4^4.6^2\}$  with vertex symbol  $[4.4.4.4.*.*]^{\text{S322}}$  (Fig. S6) or as a hxl/Shubnikov 6-c plane net  $\{3^6.4^6.5^3\}$  with vertex symbol  $[3.3.3.3.3.3.*.*.*.*.*.*.]$  (Fig. S7).

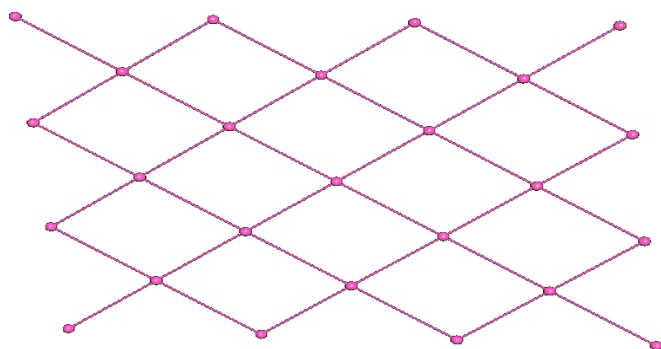

**Fig. S6.** View of the **sql** tetragonal plane net.

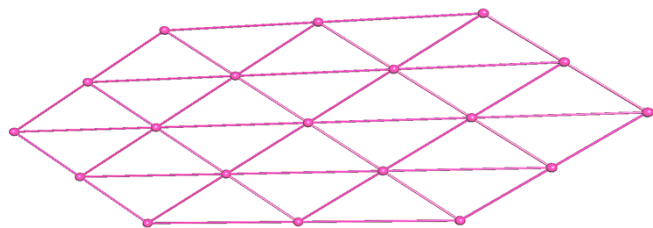

**Fig. S7.** View of the **hxl** 6-c plane net.

## References

- S1. Bruker WINEPR System 2.11 (shareware), Bruker-Franzen Analytic GmbH, Bremen, Germany, 1996
- S2. E. V. Alexandrov, V. A. Blatov, A. V. Kochetkov and D. M. Proserpio, *CrystEngComm*, 2011, **13**, 3947-3958.
- S3. V. A. Blatov, M. O'Keeffe and D. M. Proserpio, *CrystEngComm*, 2010, **12**, 44-48.
